# Supplementary material for: A Novel Machine Learning Model to Predict the Photo-Degradation Performance of Different Photocatalysts on a Variety of Water Contaminants
Source: MDPI journal article supplement (doi:10.3390/catal11091107), 2021-09-15
Supplement: s1 [file s1]

## Supplementary materials

**Table S1: The photocatalysis data used for the CGCNN-MF-ANN model**

| Photocat. | Contaminants       | Photocat. dosage (g/L) | Photocat. size (nm)* | Initial conc. (mg/L) | pH    | Light type <sup>#</sup> | k (min <sup>-1</sup> ) | Ref |
|-----------|--------------------|------------------------|----------------------|----------------------|-------|-------------------------|------------------------|-----|
| ZnO       | Phenoxyacetic acid | 0.30                   | N/A                  | 15.00                | 6.00  | 1                       | 0.0499                 | 1   |
| ZnO       | Phenoxyacetic acid | 0.50                   | N/A                  | 15.00                | 6.00  | 1                       | 0.0395                 | 1   |
| ZnO       | Phenoxyacetic acid | 0.30                   | N/A                  | 25.00                | 6.00  | 1                       | 0.0261                 | 1   |
| ZnO       | Phenoxyacetic acid | 0.50                   | N/A                  | 25.00                | 6.00  | 1                       | 0.0220                 | 1   |
| ZnO       | Phenoxyacetic acid | 0.30                   | N/A                  | 15.00                | 8.00  | 1                       | 0.0632                 | 1   |
| ZnO       | Phenoxyacetic acid | 0.50                   | N/A                  | 15.00                | 8.00  | 1                       | 0.0502                 | 1   |
| ZnO       | Phenoxyacetic acid | 0.30                   | N/A                  | 25.00                | 8.00  | 1                       | 0.0305                 | 1   |
| ZnO       | Phenoxyacetic acid | 0.50                   | N/A                  | 25.00                | 8.00  | 1                       | 0.0324                 | 1   |
| ZnO       | Phenoxyacetic acid | 0.20                   | N/A                  | 20.00                | 7.00  | 1                       | 0.0194                 | 1   |
| ZnO       | Phenoxyacetic acid | 0.60                   | N/A                  | 20.00                | 7.00  | 1                       | 0.0174                 | 1   |
| ZnO       | Phenoxyacetic acid | 0.40                   | N/A                  | 10.00                | 7.00  | 1                       | 0.0762                 | 1   |
| ZnO       | Phenoxyacetic acid | 0.40                   | N/A                  | 30.00                | 7.00  | 1                       | 0.0229                 | 1   |
| ZnO       | Phenoxyacetic acid | 0.40                   | N/A                  | 20.00                | 5.00  | 1                       | 0.0225                 | 1   |
| ZnO       | Phenoxyacetic acid | 0.40                   | N/A                  | 20.00                | 9.00  | 1                       | 0.0375                 | 1   |
| ZnO       | Phenoxyacetic acid | 0.40                   | N/A                  | 20.00                | 7.00  | 1                       | 0.0595                 | 1   |
| ZnO       | Phenoxyacetic acid | 0.40                   | N/A                  | 17.00                | 7.93  | 1                       | 0.0579                 | 1   |
| ZnO       | Phenoxyacetic acid | 0.40                   | N/A                  | 17.00                | 7.12  | 1                       | 0.0650                 | 1   |
| ZnO       | Phenoxyacetic acid | 0.40                   | N/A                  | 19.00                | 7.21  | 1                       | 0.0594                 | 1   |
| ZnO       | Phenoxyacetic acid | 0.40                   | N/A                  | 16.00                | 6.73  | 1                       | 0.0641                 | 1   |
| ZnO       | Phenoxyacetic acid | 0.40                   | N/A                  | 15.00                | 7.01  | 1                       | 0.0745                 | 1   |
| ZnO       | 4-Nitrophenol      | 1.50                   | 100-4000             | 27.82                | 1.00  | 3                       | 0.0133                 | 2   |
| ZnO       | 4-Nitrophenol      | 1.50                   | 100-4000             | 27.82                | 3.00  | 3                       | 0.0171                 | 2   |
| ZnO       | 4-Nitrophenol      | 1.50                   | 100-4000             | 27.82                | 5.00  | 3                       | 0.0242                 | 2   |
| ZnO       | 4-Nitrophenol      | 1.50                   | 100-4000             | 27.82                | 7.00  | 3                       | 0.0324                 | 2   |
| ZnO       | 4-Nitrophenol      | 1.50                   | 100-4000             | 27.82                | 9.00  | 3                       | 0.0389                 | 2   |
| ZnO       | 4-Nitrophenol      | 1.50                   | 100-4000             | 27.82                | 11.00 | 3                       | 0.0679                 | 2   |
| ZnO       | 4-Nitrophenol      | 1.50                   | 100-4000             | 55.64                | 5.00  | 3                       | 0.0151                 | 2   |
| ZnO       | 4-Nitrophenol      | 1.50                   | 100-4000             | 83.46                | 5.00  | 3                       | 0.0119                 | 2   |
| ZnO       | 4-Nitrophenol      | 1.50                   | 100-4000             | 111.28               | 5.00  | 3                       | 0.0058                 | 2   |
| ZnO       | Congo red          | 0.20                   | 30.1                 | 16.02                | N/A   | 1                       | 0.0062                 | 3   |
| ZnO       | Direct blue 15     | 0.50                   | N/A                  | 25.00                | N/A   | 2                       | 0.0048                 | 4   |
| ZnO       | Crystal violet     | 0.40                   | ~200                 | 10.00                | 9.00  | 3                       | 0.0790                 | 5   |
| ZnO       | Basic Blue-41      | 0.40                   | ~200                 | 10.00                | 9.00  | 3                       | 0.1000                 | 5   |
| ZnO       | Methyl red         | 0.40                   | ~200                 | 10.00                | 9.00  | 3                       | 0.0140                 | 5   |
| ZnO       | Triclocarban       | 1.00                   | >1000                | 0.11                 | 7.00  | 1                       | 0.0230                 | 6   |
| ZnO       | Ciprofloxacin      | 0.02                   | 2.1                  | 5.00                 | 4.00  | 2                       | 0.0117                 | 7   |

|                  |                   |      |               |       |       |   |        |    |
|------------------|-------------------|------|---------------|-------|-------|---|--------|----|
| ZnO              | Ciprofloxacin     | 0.02 | 2.1           | 5.00  | 7.00  | 2 | 0.0048 | 7  |
| ZnO              | Ciprofloxacin     | 0.02 | 2.1           | 5.00  | 10.00 | 2 | 0.0043 | 7  |
| ZnO              | Carbamazepine     | 0.05 | N/A           | 1.00  | 7.00  | 2 | 0.0152 | 8  |
| ZnO              | Diclofenac sodium | 0.05 | N/A           | 1.00  | 7.00  | 2 | 0.0574 | 8  |
| ZnO              | Ibuprofen sodium  | 0.05 | N/A           | 1.00  | 7.00  | 2 | 0.0328 | 8  |
| ZnO              | Metronidazole     | 0.02 | 20-50         | 10.00 | N/A   | 2 | 0.0720 | 9  |
| ZnO              | 2-Chlorophenol    | 1.00 | 18            | 50.00 | N/A   | 3 | 0.0171 | 10 |
| ZnO              | Phenol            | 0.50 | N/A           | 10.00 | 5.20  | 1 | 0.0464 | 11 |
| ZnO              | Phenol            | 1.00 | N/A           | 10.00 | 5.20  | 1 | 0.0526 | 11 |
| ZnO              | Phenol            | 1.50 | N/A           | 10.00 | 5.20  | 1 | 0.0590 | 11 |
| ZnO              | Phenol            | 2.00 | N/A           | 10.00 | 5.20  | 1 | 0.0655 | 11 |
| ZnO              | Phenol            | 2.50 | N/A           | 10.00 | 5.20  | 1 | 0.0793 | 11 |
| ZnO              | Phenol            | 3.00 | N/A           | 10.00 | 5.20  | 1 | 0.0653 | 11 |
| ZnO              | Phenol            | 2.50 | N/A           | 10.00 | 4.00  | 1 | 0.0695 | 11 |
| ZnO              | Phenol            | 2.50 | N/A           | 10.00 | 6.80  | 1 | 0.0647 | 11 |
| ZnO              | Phenol            | 2.50 | N/A           | 10.00 | 7.00  | 1 | 0.0635 | 11 |
| ZnO              | Phenol            | 2.50 | N/A           | 10.00 | 9.00  | 1 | 0.0443 | 11 |
| ZnO              | Phenol            | 2.50 | N/A           | 10.00 | 11.00 | 1 | 0.0139 | 11 |
| ZnO              | Phenol            | 2.50 | N/A           | 20.00 | 5.20  | 1 | 0.0499 | 11 |
| ZnO              | Phenol            | 2.50 | N/A           | 40.00 | 5.20  | 1 | 0.0323 | 11 |
| ZnO              | Phenol            | 2.50 | N/A           | 80.00 | 5.20  | 1 | 0.0228 | 11 |
| ZnO              | Resorcinol        | 0.50 | N/A           | 10.00 | 6.80  | 1 | 0.0662 | 11 |
| ZnO              | Resorcinol        | 1.00 | N/A           | 10.00 | 6.80  | 1 | 0.0748 | 11 |
| ZnO              | Resorcinol        | 1.50 | N/A           | 10.00 | 6.80  | 1 | 0.0829 | 11 |
| ZnO              | Resorcinol        | 2.50 | N/A           | 10.00 | 6.80  | 1 | 0.0968 | 11 |
| ZnO              | Resorcinol        | 3.00 | N/A           | 10.00 | 6.80  | 1 | 0.0895 | 11 |
| ZnO              | Resorcinol        | 2.00 | N/A           | 10.00 | 4.00  | 1 | 0.0613 | 11 |
| ZnO              | Resorcinol        | 2.00 | N/A           | 10.00 | 5.20  | 1 | 0.0711 | 11 |
| ZnO              | Resorcinol        | 2.00 | N/A           | 20.00 | 11.00 | 1 | 0.0777 | 11 |
| ZnO              | Resorcinol        | 2.00 | N/A           | 40.00 | 11.00 | 1 | 0.0463 | 11 |
| ZnO              | Resorcinol        | 2.00 | N/A           | 80.00 | 11.00 | 1 | 0.0273 | 11 |
| SnO <sub>2</sub> | Rhodamine B       | 1.00 | 2.9           | 4.79  | 2.00  | 1 | 0.0022 | 12 |
| SnO <sub>2</sub> | Rhodamine B       | 1.00 | 2.9           | 4.79  | 6.00  | 1 | 0.0033 | 12 |
| SnO <sub>2</sub> | Rhodamine B       | 1.00 | 2.9           | 4.79  | 8.00  | 1 | 0.0219 | 12 |
| SnO <sub>2</sub> | Direct blue 15    | 0.50 | N/A           | 25.00 | N/A   | 2 | 0.0016 | 4  |
| SnO <sub>2</sub> | Methylene blue    | 0.22 | 4.5           | 10.00 | N/A   | 1 | 0.0134 | 13 |
| SnO <sub>2</sub> | Methylene blue    | 0.22 | <44000        | 10.00 | N/A   | 1 | 0.0019 | 13 |
| SnO <sub>2</sub> | Methylene blue    | 0.25 | 15-20         | 31.99 | N/A   | 1 | 0.0952 | 14 |
| SnO <sub>2</sub> | Aniline           | 1.00 | D120-280,L300 | 20.00 | 4.00  | 1 | 0.0459 | 15 |
| SnO <sub>2</sub> | Aniline           | 1.00 | D120-280,L300 | 20.00 | 7.00  | 1 | 0.0561 | 15 |
| SnO <sub>2</sub> | Aniline           | 1.00 | D120-280,L300 | 20.00 | 10.00 | 1 | 0.0629 | 15 |

|                  |                    |      |               |       |       |   |        |    |
|------------------|--------------------|------|---------------|-------|-------|---|--------|----|
| SnO <sub>2</sub> | 4-Nitroaniline     | 1.00 | D120-280,L300 | 20.00 | 4.00  | 1 | 0.0260 | 15 |
| SnO <sub>2</sub> | 4-Nitroaniline     | 1.00 | D120-280,L300 | 20.00 | 7.00  | 1 | 0.0201 | 15 |
| SnO <sub>2</sub> | 4-Nitroaniline     | 1.00 | D120-280,L300 | 20.00 | 10.00 | 1 | 0.0115 | 15 |
| SnO <sub>2</sub> | 2,4-Dinitroaniline | 1.00 | D120-280,L300 | 20.00 | 4.00  | 1 | 0.0046 | 15 |
| SnO <sub>2</sub> | 2,4-Dinitroaniline | 1.00 | D120-280,L300 | 20.00 | 7.00  | 1 | 0.0028 | 15 |
| SnO <sub>2</sub> | 2,4-Dinitroaniline | 1.00 | D120-280,L300 | 20.00 | 10.00 | 1 | 0.0008 | 15 |
| SnO <sub>2</sub> | Aniline            | 1.00 | D80-100,L300  | 20.00 | 4.00  | 1 | 0.0244 | 15 |
| SnO <sub>2</sub> | Aniline            | 1.00 | D80-100,L300  | 20.00 | 7.00  | 1 | 0.0311 | 15 |
| SnO <sub>2</sub> | Aniline            | 1.00 | D80-100,L300  | 20.00 | 10.00 | 1 | 0.0453 | 15 |
| SnO <sub>2</sub> | 4-Nitroaniline     | 1.00 | D80-100,L300  | 20.00 | 4.00  | 1 | 0.0184 | 15 |
| SnO <sub>2</sub> | 4-Nitroaniline     | 1.00 | D80-100,L300  | 20.00 | 7.00  | 1 | 0.0146 | 15 |
| SnO <sub>2</sub> | 4-Nitroaniline     | 1.00 | D80-100,L300  | 20.00 | 10.00 | 1 | 0.0061 | 15 |
| SnO <sub>2</sub> | 2,4-Dinitroaniline | 1.00 | D80-100,L300  | 20.00 | 4.00  | 1 | 0.0025 | 15 |
| SnO <sub>2</sub> | 2,4-Dinitroaniline | 1.00 | D80-100,L300  | 20.00 | 7.00  | 1 | 0.0012 | 15 |
| SnO <sub>2</sub> | 2,4-Dinitroaniline | 1.00 | D80-100,L300  | 20.00 | 10.00 | 1 | 0.0004 | 15 |
| SnO <sub>2</sub> | Aniline            | 1.00 | 70-105        | 20.00 | 4.00  | 1 | 0.0355 | 15 |
| SnO <sub>2</sub> | Aniline            | 1.00 | 70-105        | 20.00 | 7.00  | 1 | 0.0439 | 15 |
| SnO <sub>2</sub> | Aniline            | 1.00 | 70-105        | 20.00 | 10.00 | 1 | 0.0543 | 15 |
| SnO <sub>2</sub> | 4-Nitroaniline     | 1.00 | 70-105        | 20.00 | 4.00  | 1 | 0.0217 | 15 |
| SnO <sub>2</sub> | 4-Nitroaniline     | 1.00 | 70-105        | 20.00 | 7.00  | 1 | 0.0182 | 15 |
| SnO <sub>2</sub> | 4-Nitroaniline     | 1.00 | 70-105        | 20.00 | 10.00 | 1 | 0.0083 | 15 |
| SnO <sub>2</sub> | 2,4-Dinitroaniline | 1.00 | 70-105        | 20.00 | 4.00  | 1 | 0.0035 | 15 |
| SnO <sub>2</sub> | 2,4-Dinitroaniline | 1.00 | 70-105        | 20.00 | 7.00  | 1 | 0.0018 | 15 |
| SnO <sub>2</sub> | 2,4-Dinitroaniline | 1.00 | 70-105        | 20.00 | 10.00 | 1 | 0.0006 | 15 |
| SnO <sub>2</sub> | Aniline            | 1.00 | 400-1800      | 20.00 | 4.00  | 1 | 0.0135 | 15 |
| SnO <sub>2</sub> | Aniline            | 1.00 | 400-1800      | 20.00 | 7.00  | 1 | 0.0275 | 15 |
| SnO <sub>2</sub> | Aniline            | 1.00 | 400-1800      | 20.00 | 10.00 | 1 | 0.0343 | 15 |
| SnO <sub>2</sub> | 4-Nitroaniline     | 1.00 | 400-1800      | 20.00 | 4.00  | 1 | 0.0089 | 15 |
| SnO <sub>2</sub> | 4-Nitroaniline     | 1.00 | 400-1800      | 20.00 | 7.00  | 1 | 0.0057 | 15 |
| SnO <sub>2</sub> | 4-Nitroaniline     | 1.00 | 400-1800      | 20.00 | 10.00 | 1 | 0.0018 | 15 |
| SnO <sub>2</sub> | 2,4-Dinitroaniline | 1.00 | 400-1800      | 20.00 | 4.00  | 1 | 0.0019 | 15 |
| SnO <sub>2</sub> | 2,4-Dinitroaniline | 1.00 | 400-1800      | 20.00 | 7.00  | 1 | 0.0007 | 15 |
| SnO <sub>2</sub> | 2,4-Dinitroaniline | 1.00 | 400-1800      | 20.00 | 10.00 | 1 | 0.0004 | 15 |
| SnO <sub>2</sub> | Crystal violet     | 0.40 | 86-230        | 10.00 | 9.00  | 3 | 0.0100 | 5  |
| SnO <sub>2</sub> | Basic Blue-41      | 0.40 | 86-230        | 10.00 | 9.00  | 3 | 0.0170 | 5  |
| SnO <sub>2</sub> | Methyl red         | 0.40 | 86-230        | 10.00 | 9.00  | 3 | 0.0040 | 5  |
| SnO <sub>2</sub> | Rhodamine B        | 1.00 | 2.9           | 4.79  | 2.00  | 1 | 0.0236 | 16 |
| SnO <sub>2</sub> | Rhodamine B        | 1.00 | 2.9           | 4.79  | 6.00  | 1 | 0.0022 | 16 |
| SnO <sub>2</sub> | Rhodamine B        | 1.00 | 2.9           | 4.79  | 8.00  | 1 | 0.0017 | 16 |
| SnO <sub>2</sub> | Amaranth           | 0.02 | 3.73          | 30.00 | 7.00  | 1 | 0.0253 | 17 |
| SnO <sub>2</sub> | Amaranth           | 0.02 | 3.73          | 40.00 | 7.00  | 1 | 0.0121 | 17 |

|                                |                  |      |                 |       |       |   |        |    |
|--------------------------------|------------------|------|-----------------|-------|-------|---|--------|----|
| SnO <sub>2</sub>               | Amaranth         | 0.02 | 3.73            | 60.00 | 7.00  | 1 | 0.0056 | 17 |
| SnO <sub>2</sub>               | Amaranth         | 0.02 | 3.73            | 80.00 | 7.00  | 1 | 0.0032 | 17 |
| SnO <sub>2</sub>               | Amaranth         | 0.02 | 5.31            | 60.00 | 7.00  | 1 | 0.0031 | 17 |
| SnO <sub>2</sub>               | Amaranth         | 0.02 | 7.6             | 60.00 | 7.00  | 1 | 0.0008 | 17 |
| SnO <sub>2</sub>               | Methylene blue   | 0.50 | N/A             | 10.00 | N/A   | 1 | 0.0028 | 18 |
| Fe <sub>2</sub> O <sub>3</sub> | Methylene blue   | 0.50 | D75,L168        | 10.00 | N/A   | 1 | 0.0035 | 19 |
| Fe <sub>2</sub> O <sub>3</sub> | Methylene blue   | 0.50 | D50-75          | 10.00 | N/A   | 1 | 0.0007 | 19 |
| Fe <sub>2</sub> O <sub>3</sub> | Methylene blue   | 0.50 | D50-70,L100-150 | 10.00 | N/A   | 1 | 0.0007 | 19 |
| Fe <sub>2</sub> O <sub>3</sub> | Methylene blue   | 0.50 | N/A             | 10.00 | N/A   | 1 | 0.0012 | 19 |
| Fe <sub>2</sub> O <sub>3</sub> | Methyl orange    | 1.00 | 70              | 40.00 | N/A   | 1 | 0.0043 | 20 |
| Fe <sub>2</sub> O <sub>3</sub> | Methyl orange    | 1.50 | 70              | 40.00 | N/A   | 1 | 0.0052 | 20 |
| Fe <sub>2</sub> O <sub>3</sub> | Methyl orange    | 2.00 | 70              | 40.00 | N/A   | 1 | 0.0079 | 20 |
| Fe <sub>2</sub> O <sub>3</sub> | Methylene blue   | 1.00 | 42              | 10.00 | 8.00  | 1 | 0.0066 | 21 |
| Fe <sub>2</sub> O <sub>3</sub> | Methylene blue   | 1.00 | 42              | 10.00 | 9.00  | 1 | 0.0557 | 21 |
| Fe <sub>2</sub> O <sub>3</sub> | Methylene blue   | 1.00 | 42              | 10.00 | 10.00 | 1 | 0.0384 | 21 |
| Fe <sub>2</sub> O <sub>3</sub> | Methylene blue   | 1.00 | 42              | 2.00  | N/A   | 1 | 0.0485 | 21 |
| Fe <sub>2</sub> O <sub>3</sub> | Methylene blue   | 1.00 | 42              | 10.00 | N/A   | 1 | 0.0844 | 21 |
| Fe <sub>2</sub> O <sub>3</sub> | Methylene blue   | 1.00 | 42              | 10.00 | N/A   | 1 | 0.0439 | 21 |
| Fe <sub>2</sub> O <sub>3</sub> | Methylene blue   | 3.00 | 42              | 10.00 | N/A   | 1 | 0.0868 | 21 |
| Fe <sub>2</sub> O <sub>3</sub> | Rhodamine B      | 0.20 | 1400            | 5.00  | 7.00  | 1 | 0.0014 | 22 |
| Fe <sub>2</sub> O <sub>3</sub> | Rhodamine B      | 1.00 | 1400            | 5.00  | 7.00  | 1 | 0.0022 | 22 |
| Fe <sub>2</sub> O <sub>3</sub> | Rhodamine B      | 1.00 | 600             | 5.00  | 7.00  | 1 | 0.0035 | 22 |
| Fe <sub>2</sub> O <sub>3</sub> | Rhodamine B      | 0.20 | 2200            | 5.00  | 7.00  | 1 | 0.0028 | 22 |
| Fe <sub>2</sub> O <sub>3</sub> | Rhodamine B      | 1.00 | 2200            | 5.00  | 7.00  | 1 | 0.0029 | 22 |
| Fe <sub>2</sub> O <sub>3</sub> | Rhodamine B      | 0.20 | 500             | 5.00  | 7.00  | 1 | 0.0032 | 22 |
| Fe <sub>2</sub> O <sub>3</sub> | Rhodamine B      | 1.00 | 500             | 5.00  | 7.00  | 1 | 0.0048 | 22 |
| Fe <sub>2</sub> O <sub>3</sub> | Atrazine         | 0.20 | 400             | 2.50  | 7.00  | 1 | 0.0067 | 22 |
| Fe <sub>2</sub> O <sub>3</sub> | Atrazine         | 1.00 | 400             | 2.50  | 7.00  | 1 | 0.0058 | 22 |
| Fe <sub>2</sub> O <sub>3</sub> | Atrazine         | 0.20 | 600             | 2.50  | 7.00  | 1 | 0.0129 | 22 |
| Fe <sub>2</sub> O <sub>3</sub> | Atrazine         | 1.00 | 600             | 2.50  | 7.00  | 1 | 0.0149 | 22 |
| Fe <sub>2</sub> O <sub>3</sub> | Atrazine         | 2.00 | 600             | 2.50  | 7.00  | 1 | 0.0139 | 22 |
| Fe <sub>2</sub> O <sub>3</sub> | Rhodamine B      | 0.20 | 44              | 20.00 | N/A   | 1 | 0.0830 | 23 |
| Fe <sub>2</sub> O <sub>3</sub> | Bismarck Brown R | 0.50 | D10-30          | 21.25 | 7.00  | 2 | 0.0050 | 24 |
| Fe <sub>2</sub> O <sub>3</sub> | Rhodamine B      | 0.30 | 120             | 10.00 | N/A   | 3 | 0.0131 | 25 |
| Fe <sub>2</sub> O <sub>3</sub> | Methylene blue   | 0.30 | 120             | 10.00 | N/A   | 3 | 0.0014 | 25 |
| Fe <sub>2</sub> O <sub>3</sub> | 4-Nitrophenol    | 0.30 | 120             | 10.00 | N/A   | 3 | 0.0010 | 25 |
| Fe <sub>2</sub> O <sub>3</sub> | Methyl orange    | 0.30 | 120             | 10.00 | N/A   | 3 | 0.0007 | 25 |
| Fe <sub>2</sub> O <sub>3</sub> | Methylene blue   | 0.20 | D30-50,L300-500 | 3.20  | N/A   | 2 | 0.0106 | 26 |
| Fe <sub>2</sub> O <sub>3</sub> | Methylene blue   | 0.20 | 20-30           | 3.20  | N/A   | 2 | 0.0082 | 26 |
| Fe <sub>2</sub> O <sub>3</sub> | Methylene blue   | 0.20 | 2000-3000       | 3.20  | N/A   | 2 | 0.0062 | 26 |
| Fe <sub>2</sub> O <sub>3</sub> | Rose bengal      | 0.38 | 20              | 35.05 | N/A   | 3 | 0.0265 | 27 |

|                                |                      |      |           |        |      |   |        |    |
|--------------------------------|----------------------|------|-----------|--------|------|---|--------|----|
| Fe <sub>2</sub> O <sub>3</sub> | Rose bengal          | 0.38 | 40        | 35.05  | N/A  | 3 | 0.0157 | 27 |
| Fe <sub>2</sub> O <sub>3</sub> | Salicylic acid       | 0.40 | 50-200    | 50.00  | N/A  | 2 | 0.0970 | 28 |
| Fe <sub>2</sub> O <sub>3</sub> | Salicylic acid       | 0.40 | 50-200    | 60.00  | N/A  | 2 | 0.0823 | 28 |
| Fe <sub>2</sub> O <sub>3</sub> | Salicylic acid       | 0.40 | 50-200    | 75.00  | N/A  | 2 | 0.0790 | 28 |
| Fe <sub>2</sub> O <sub>3</sub> | Salicylic acid       | 0.40 | 50-200    | 100.00 | N/A  | 2 | 0.0610 | 28 |
| Fe <sub>2</sub> O <sub>3</sub> | Methylene blue       | 1.00 | 55–100    | 3.20   | N/A  | 3 | 0.0120 | 29 |
| Fe <sub>2</sub> O <sub>3</sub> | Methylene blue       | 1.00 | 150–200   | 3.20   | N/A  | 3 | 0.0210 | 29 |
| Fe <sub>2</sub> O <sub>3</sub> | Salicylic acid       | 0.40 | 1000-2000 | 20.00  | N/A  | 1 | 0.0069 | 30 |
| Fe <sub>2</sub> O <sub>3</sub> | Salicylic acid       | 0.40 | N/A       | 20.00  | N/A  | 1 | 0.0009 | 30 |
| Fe <sub>2</sub> O <sub>3</sub> | Malachite green      | 2.00 | 28.9      | 100.00 | N/A  | 1 | 0.0077 | 31 |
| Fe <sub>2</sub> O <sub>3</sub> | Malachite green      | 2.00 | 19.9      | 100.00 | N/A  | 1 | 0.0095 | 31 |
| Fe <sub>2</sub> O <sub>3</sub> | Malachite green      | 2.00 | 25.3      | 100.00 | N/A  | 1 | 0.0174 | 31 |
| Fe <sub>2</sub> O <sub>3</sub> | Rhodamine B          | 0.50 | 420-550   | 4.79   | N/A  | 2 | 0.0970 | 32 |
| Fe <sub>2</sub> O <sub>3</sub> | Rhodamine B          | 0.50 | N/A       | 4.79   | N/A  | 2 | 0.0205 | 32 |
| Fe <sub>2</sub> O <sub>3</sub> | Methylene blue       | 0.02 | 250-2500  | 10.00  | 5.30 | 1 | 0.0374 | 33 |
| Fe <sub>2</sub> O <sub>3</sub> | Methylene blue       | 0.05 | 250-2500  | 10.00  | 5.30 | 1 | 0.0739 | 33 |
| Fe <sub>2</sub> O <sub>3</sub> | Methylene blue       | 0.10 | 250-2500  | 10.00  | 5.30 | 1 | 0.0317 | 33 |
| Fe <sub>2</sub> O <sub>3</sub> | Methylene blue       | 0.05 | 250-2500  | 30.00  | 5.30 | 1 | 0.0203 | 33 |
| Fe <sub>2</sub> O <sub>3</sub> | Methylene blue       | 0.05 | 250-2500  | 20.00  | 5.30 | 1 | 0.0424 | 33 |
| Fe <sub>2</sub> O <sub>3</sub> | Methylene blue       | 0.05 | 250-2500  | 5.00   | 5.30 | 1 | 0.0784 | 33 |
| TiO <sub>2</sub>               | 4-Chlorophenol       | 0.50 | <44000    | 1.29   | 5.50 | 1 | 0.0570 | 34 |
| TiO <sub>2</sub>               | 4-Chlorophenol       | 0.50 | <44000    | 2.57   | 5.50 | 1 | 0.0430 | 34 |
| TiO <sub>2</sub>               | 4-Chlorophenol       | 0.50 | <44000    | 5.14   | 5.50 | 1 | 0.0300 | 34 |
| TiO <sub>2</sub>               | 4-Chlorophenol       | 0.50 | <44000    | 6.43   | 5.50 | 1 | 0.0270 | 34 |
| TiO <sub>2</sub>               | 4-Chlorophenol       | 0.50 | <44000    | 10.28  | 5.50 | 1 | 0.0180 | 34 |
| TiO <sub>2</sub>               | 4-Chlorophenol       | 0.50 | <44000    | 12.86  | 5.50 | 1 | 0.0160 | 34 |
| TiO <sub>2</sub>               | 4-Chlorophenol       | 0.50 | <44000    | 16.20  | 5.50 | 1 | 0.0120 | 34 |
| TiO <sub>2</sub>               | 2,6-Dichlorophenol   | 0.50 | <44000    | 3.26   | 5.50 | 1 | 0.0500 | 34 |
| TiO <sub>2</sub>               | 2,6-Dichlorophenol   | 0.50 | <44000    | 6.52   | 5.50 | 1 | 0.0370 | 34 |
| TiO <sub>2</sub>               | 2,6-Dichlorophenol   | 0.50 | <44000    | 8.15   | 5.50 | 1 | 0.0310 | 34 |
| TiO <sub>2</sub>               | 2,6-Dichlorophenol   | 0.50 | <44000    | 13.04  | 5.50 | 1 | 0.0240 | 34 |
| TiO <sub>2</sub>               | 2,6-Dichlorophenol   | 0.50 | <44000    | 16.30  | 5.50 | 1 | 0.0180 | 34 |
| TiO <sub>2</sub>               | Sulfanilamide        | 2.50 | <40000    | 17.22  | 6.69 | 1 | 0.0312 | 35 |
| TiO <sub>2</sub>               | Sulfacetamide sodium | 2.50 | <40000    | 23.62  | 7.35 | 1 | 0.0133 | 35 |
| TiO <sub>2</sub>               | Sulfamethoxazole     | 2.50 | <40000    | 25.33  | 5.63 | 1 | 0.0241 | 35 |
| TiO <sub>2</sub>               | Sulfadiazine sodium  | 2.50 | <40000    | 27.23  | 6.60 | 1 | 0.0128 | 35 |
| TiO <sub>2</sub>               | Sulfathiazole sodium | 2.50 | <40000    | 27.73  | 7.10 | 1 | 0.0181 | 35 |
| TiO <sub>2</sub>               | Carbamazepine        | 0.10 | <10       | 4.30   | 6.50 | 1 | 0.0079 | 36 |
| TiO <sub>2</sub>               | Carbamazepine        | 1.00 | <10       | 4.30   | 6.50 | 1 | 0.0250 | 36 |
| TiO <sub>2</sub>               | Carbamazepine        | 0.10 | <10       | 1.00   | 6.50 | 1 | 0.0380 | 36 |
| TiO <sub>2</sub>               | Carbamazepine        | 1.00 | <10       | 1.00   | 6.50 | 1 | 0.0800 | 36 |

|                  |                    |      |        |        |       |   |        |    |
|------------------|--------------------|------|--------|--------|-------|---|--------|----|
| TiO <sub>2</sub> | Clofibric acid     | 0.05 | <10    | 5.00   | 6.50  | 1 | 0.0096 | 36 |
| TiO <sub>2</sub> | Clofibric acid     | 0.08 | <10    | 5.00   | 6.50  | 1 | 0.0180 | 36 |
| TiO <sub>2</sub> | Clofibric acid     | 0.50 | <10    | 5.00   | 6.50  | 1 | 0.0250 | 36 |
| TiO <sub>2</sub> | Clofibric acid     | 0.08 | <10    | 0.50   | 6.50  | 1 | 0.0240 | 36 |
| TiO <sub>2</sub> | Reactive violet 5  | 0.08 | 230    | 10.00  | 4.00  | 1 | 0.0870 | 37 |
| TiO <sub>2</sub> | Reactive violet 5  | 0.08 | 230    | 10.00  | 5.00  | 1 | 0.0640 | 37 |
| TiO <sub>2</sub> | Reactive violet 5  | 0.08 | 230    | 10.00  | 6.00  | 1 | 0.0520 | 37 |
| TiO <sub>2</sub> | Reactive violet 5  | 0.08 | 230    | 10.00  | 8.00  | 1 | 0.0500 | 37 |
| TiO <sub>2</sub> | Reactive violet 5  | 0.08 | 230    | 10.00  | 9.00  | 1 | 0.0750 | 37 |
| TiO <sub>2</sub> | Reactive violet 5  | 0.08 | 230    | 10.00  | 10.00 | 1 | 0.0900 | 37 |
| TiO <sub>2</sub> | Reactive violet 5  | 0.08 | 230    | 15.00  | 4.00  | 1 | 0.0742 | 37 |
| TiO <sub>2</sub> | Reactive violet 5  | 0.08 | 230    | 20.00  | 4.00  | 1 | 0.0569 | 37 |
| TiO <sub>2</sub> | Reactive violet 5  | 0.08 | 230    | 30.00  | 4.00  | 1 | 0.0368 | 37 |
| TiO <sub>2</sub> | Reactive violet 5  | 0.08 | 230    | 40.00  | 4.00  | 1 | 0.0259 | 37 |
| TiO <sub>2</sub> | Reactive violet 5  | 0.08 | 230    | 50.00  | 4.00  | 1 | 0.0173 | 37 |
| TiO <sub>2</sub> | Reactive violet 5  | 0.01 | 230    | 10.00  | 4.00  | 1 | 0.0130 | 37 |
| TiO <sub>2</sub> | Reactive violet 5  | 0.04 | 230    | 10.00  | 4.00  | 1 | 0.0369 | 37 |
| TiO <sub>2</sub> | Reactive violet 5  | 0.05 | 230    | 10.00  | 4.00  | 1 | 0.0468 | 37 |
| TiO <sub>2</sub> | Reactive violet 5  | 0.06 | 230    | 10.00  | 4.00  | 1 | 0.0644 | 37 |
| TiO <sub>2</sub> | Reactive violet 5  | 0.07 | 230    | 10.00  | 4.00  | 1 | 0.0770 | 37 |
| TiO <sub>2</sub> | Crystal violet     | 0.40 | 55-170 | 10.00  | 9.00  | 3 | 0.0260 | 5  |
| TiO <sub>2</sub> | Basic blue 41      | 0.40 | 55-170 | 10.00  | 9.00  | 3 | 0.0450 | 5  |
| TiO <sub>2</sub> | Methyl red         | 0.40 | 55-170 | 10.00  | 9.00  | 3 | 0.0080 | 5  |
| TiO <sub>2</sub> | Reactive blue 4    | 1.00 | <25    | 60.00  | 6.00  | 1 | 0.0885 | 38 |
| TiO <sub>2</sub> | Methylene blue     | 2.00 | 37.71  | 100.00 | N/A   | 1 | 0.0439 | 39 |
| TiO <sub>2</sub> | Methyl orange      | 2.00 | 37.71  | 100.00 | N/A   | 1 | 0.0487 | 39 |
| TiO <sub>2</sub> | Rhodamine B        | 2.00 | 37.71  | 100.00 | N/A   | 1 | 0.0468 | 39 |
| TiO <sub>2</sub> | Carmin indigo      | 2.00 | 37.71  | 100.00 | N/A   | 1 | 0.0554 | 39 |
| TiO <sub>2</sub> | Eriochrome Black T | 2.00 | 37.71  | 100.00 | N/A   | 1 | 0.0552 | 39 |
| WO <sub>3</sub>  | Amoxicillin        | 0.10 | <200   | 0.37   | 6.00  | 3 | 0.0138 | 40 |
| WO <sub>3</sub>  | Amoxicillin        | 0.10 | <200   | 0.73   | 6.00  | 3 | 0.0070 | 40 |
| WO <sub>3</sub>  | Amoxicillin        | 0.30 | <200   | 0.37   | 4.00  | 3 | 0.0315 | 40 |
| WO <sub>3</sub>  | Amoxicillin        | 0.30 | <200   | 0.73   | 4.00  | 3 | 0.0150 | 40 |
| WO <sub>3</sub>  | Amoxicillin        | 0.50 | <200   | 0.37   | 6.00  | 3 | 0.0210 | 40 |
| WO <sub>3</sub>  | Amoxicillin        | 0.50 | <200   | 0.73   | 6.00  | 3 | 0.0129 | 40 |
| WO <sub>3</sub>  | Amoxicillin        | 0.10 | <200   | 0.55   | 8.00  | 3 | 0.0072 | 40 |
| WO <sub>3</sub>  | Amoxicillin        | 0.50 | <200   | 0.55   | 8.00  | 3 | 0.0135 | 40 |
| WO <sub>3</sub>  | Amoxicillin        | 0.30 | <200   | 0.37   | 8.00  | 3 | 0.0171 | 40 |
| WO <sub>3</sub>  | Amoxicillin        | 0.10 | <200   | 0.55   | 4.00  | 3 | 0.0149 | 40 |
| WO <sub>3</sub>  | Amoxicillin        | 0.30 | <200   | 0.73   | 8.00  | 3 | 0.0088 | 40 |
| WO <sub>3</sub>  | Methylene blue     | 2.00 | 33.6   | 20.00  | 9.00  | 3 | 0.0160 | 41 |

|                 |                |      |        |       |      |   |        |    |
|-----------------|----------------|------|--------|-------|------|---|--------|----|
| WO <sub>3</sub> | Methylene blue | 2.00 | 19.6   | 20.00 | 9.00 | 3 | 0.0570 | 41 |
| WO <sub>3</sub> | Methylene blue | 2.00 | 23.4   | 20.00 | 9.00 | 3 | 0.0330 | 41 |
| WO <sub>3</sub> | Methylene blue | 2.00 | 37.7   | 20.00 | 9.00 | 3 | 0.0160 | 41 |
| WO <sub>3</sub> | Rhodamine B    | 0.40 | 4000   | 10.00 | N/A  | 1 | 0.0151 | 42 |
| WO <sub>3</sub> | Rhodamine B    | 0.40 | 3500   | 10.00 | N/A  | 1 | 0.0560 | 42 |
| WO <sub>3</sub> | Rhodamine B    | 0.40 | 4000   | 10.00 | N/A  | 2 | 0.0030 | 42 |
| WO <sub>3</sub> | Rhodamine B    | 0.40 | 3500   | 10.00 | N/A  | 2 | 0.0028 | 42 |
| WO <sub>3</sub> | Rhodamine B    | 3.00 | 80-100 | 5.00  | N/A  | 2 | 0.0077 | 43 |
| WO <sub>3</sub> | Rhodamine B    | 3.00 | 4000   | 5.00  | N/A  | 2 | 0.0034 | 43 |
| WO <sub>3</sub> | Rhodamine B    | 1.00 | 18     | 5.00  | N/A  | 2 | 0.0073 | 44 |
| WO <sub>3</sub> | Rhodamine B    | 1.00 | 19     | 5.00  | N/A  | 2 | 0.0056 | 44 |
| WO <sub>3</sub> | Rhodamine B    | 1.00 | 16     | 5.00  | N/A  | 2 | 0.0186 | 44 |
| WO <sub>3</sub> | Rhodamine B    | 1.00 | 15     | 5.00  | N/A  | 2 | 0.0065 | 44 |
| WO <sub>3</sub> | Rhodamine B    | 1.00 | 20     | 5.00  | N/A  | 2 | 0.0132 | 44 |
| WO <sub>3</sub> | Rhodamine B    | 1.00 | 17     | 5.00  | N/A  | 2 | 0.0143 | 44 |
| WO <sub>3</sub> | Rhodamine B    | 1.00 | >100   | 5.00  | N/A  | 2 | 0.0124 | 44 |
| WO <sub>3</sub> | Indigo carmine | 1.00 | 18     | 30.00 | N/A  | 2 | 0.0168 | 44 |
| WO <sub>3</sub> | Indigo carmine | 1.00 | 19     | 30.00 | N/A  | 2 | 0.0223 | 44 |
| WO <sub>3</sub> | Indigo carmine | 1.00 | 16     | 30.00 | N/A  | 2 | 0.0190 | 44 |
| WO <sub>3</sub> | Indigo carmine | 1.00 | 15     | 30.00 | N/A  | 2 | 0.0530 | 44 |
| WO <sub>3</sub> | Indigo carmine | 1.00 | 20     | 30.00 | N/A  | 2 | 0.0126 | 44 |
| WO <sub>3</sub> | Indigo carmine | 1.00 | 17     | 30.00 | N/A  | 2 | 0.0071 | 44 |
| WO <sub>3</sub> | Indigo carmine | 1.00 | >100   | 30.00 | N/A  | 2 | 0.0048 | 44 |
| WO <sub>3</sub> | Congo red      | 1.00 | 18     | 20.00 | N/A  | 2 | 0.0014 | 44 |
| WO <sub>3</sub> | Congo red      | 1.00 | 19     | 20.00 | N/A  | 2 | 0.0011 | 44 |
| WO <sub>3</sub> | Congo red      | 1.00 | 16     | 20.00 | N/A  | 2 | 0.0011 | 44 |
| WO <sub>3</sub> | Congo red      | 3.00 | 18     | 20.00 | N/A  | 2 | 0.0023 | 44 |
| WO <sub>3</sub> | Congo red      | 1.00 | >100   | 20.00 | N/A  | 2 | 0.0005 | 44 |
| WO <sub>3</sub> | Indigo carmine | 1.00 | >100   | 30.00 | N/A  | 1 | 0.0049 | 45 |
| WO <sub>3</sub> | Indigo carmine | 1.00 | >100   | 30.00 | N/A  | 1 | 0.0250 | 45 |
| WO <sub>3</sub> | Indigo carmine | 1.00 | >100   | 30.00 | N/A  | 1 | 0.0123 | 45 |
| WO <sub>3</sub> | Indigo carmine | 1.00 | >100   | 30.00 | N/A  | 1 | 0.0330 | 45 |
| WO <sub>3</sub> | Rhodamine B    | 1.00 | >100   | 5.00  | N/A  | 1 | 0.0194 | 45 |
| WO <sub>3</sub> | Rhodamine B    | 1.00 | >100   | 5.00  | N/A  | 1 | 0.0142 | 45 |
| WO <sub>3</sub> | Rhodamine B    | 1.00 | >100   | 5.00  | N/A  | 1 | 0.0145 | 45 |
| WO <sub>3</sub> | Rhodamine B    | 1.00 | >100   | 5.00  | N/A  | 1 | 0.0232 | 45 |
| WO <sub>3</sub> | Methyl orange  | 1.00 | >100   | 10.00 | N/A  | 1 | 0.0010 | 45 |
| WO <sub>3</sub> | Methyl orange  | 1.00 | >100   | 10.00 | N/A  | 1 | 0.0019 | 45 |
| WO <sub>3</sub> | Methyl orange  | 1.00 | >100   | 10.00 | N/A  | 1 | 0.0018 | 45 |
| WO <sub>3</sub> | Methyl orange  | 1.00 | >100   | 10.00 | N/A  | 1 | 0.0028 | 45 |
| WO <sub>3</sub> | Congo red      | 1.00 | >100   | 20.00 | N/A  | 1 | 0.0005 | 45 |

|                    |                |      |                 |       |      |   |        |    |
|--------------------|----------------|------|-----------------|-------|------|---|--------|----|
| WO <sub>3</sub>    | Congo red      | 1.00 | >100            | 20.00 | N/A  | 1 | 0.0013 | 45 |
| WO <sub>3</sub>    | Congo red      | 1.00 | >100            | 20.00 | N/A  | 1 | 0.0014 | 45 |
| WO <sub>3</sub>    | Congo red      | 1.00 | >100            | 20.00 | N/A  | 1 | 0.0016 | 45 |
| WO <sub>3</sub>    | Methylene blue | 1.00 | 26.41           | 10.00 | N/A  | 2 | 0.0069 | 46 |
| WO <sub>3</sub>    | Rhodamine B    | 1.00 | 20-100          | 5.00  | N/A  | 3 | 0.0040 | 47 |
| WO <sub>3</sub>    | Rhodamine B    | 1.00 | 20-100          | 5.00  | N/A  | 3 | 0.0096 | 47 |
| WO <sub>3</sub>    | Rhodamine B    | 1.00 | 20-100          | 5.00  | N/A  | 3 | 0.0120 | 47 |
| WO <sub>3</sub>    | Rhodamine B    | 1.00 | 20-100          | 5.00  | N/A  | 3 | 0.0068 | 47 |
| WO <sub>3</sub>    | Rhodamine B    | 1.00 | 20-100          | 5.00  | N/A  | 3 | 0.0072 | 47 |
| WO <sub>3</sub>    | Indigo carmine | 1.00 | 20-100          | 30.00 | N/A  | 3 | 0.0023 | 47 |
| WO <sub>3</sub>    | Indigo carmine | 1.00 | 20-100          | 30.00 | N/A  | 3 | 0.0115 | 47 |
| WO <sub>3</sub>    | Indigo carmine | 1.00 | 20-100          | 30.00 | N/A  | 3 | 0.0192 | 47 |
| WO <sub>3</sub>    | Indigo carmine | 1.00 | 20-100          | 30.00 | N/A  | 3 | 0.0040 | 47 |
| WO <sub>3</sub>    | Indigo carmine | 1.00 | 20-100          | 30.00 | N/A  | 3 | 0.0109 | 47 |
| WO <sub>3</sub>    | Rhodamine B    | 1.00 | 20-100          | 20.00 | N/A  | 3 | 0.0015 | 47 |
| WO <sub>3</sub>    | Rhodamine B    | 1.00 | 20-100          | 20.00 | N/A  | 3 | 0.0025 | 47 |
| WO <sub>3</sub>    | Rhodamine B    | 1.00 | 100             | 5.00  | 6.00 | 3 | 0.0125 | 48 |
| WO <sub>3</sub>    | Rhodamine B    | 1.00 | 10-50           | 5.00  | 6.00 | 3 | 0.0087 | 48 |
| WO <sub>3</sub>    | Rhodamine B    | 1.00 | 10-50           | 5.00  | 6.00 | 3 | 0.0230 | 48 |
| WO <sub>3</sub>    | Rhodamine B    | 1.00 | 10-50           | 5.00  | 6.00 | 3 | 0.0141 | 48 |
| WO <sub>3</sub>    | Rhodamine B    | 1.00 | 10-50           | 5.00  | 6.00 | 3 | 0.0067 | 48 |
| WO <sub>3</sub>    | Indigo carmine | 1.00 | 100             | 30.00 | 6.00 | 3 | 0.0044 | 48 |
| WO <sub>3</sub>    | Indigo carmine | 1.00 | 10-50           | 30.00 | 6.00 | 3 | 0.0135 | 48 |
| WO <sub>3</sub>    | Indigo carmine | 1.00 | 10-50           | 30.00 | 6.00 | 3 | 0.0290 | 48 |
| WO <sub>3</sub>    | Indigo carmine | 1.00 | 10-50           | 30.00 | 6.00 | 3 | 0.0260 | 48 |
| WO <sub>3</sub>    | Indigo carmine | 1.00 | 10-50           | 30.00 | 6.00 | 3 | 0.0054 | 48 |
| WO <sub>3</sub>    | Congo red      | 1.00 | 100             | 20.00 | 6.00 | 3 | 0.0005 | 48 |
| WO <sub>3</sub>    | Congo red      | 1.00 | 10-50           | 20.00 | 6.00 | 3 | 0.0010 | 48 |
| WO <sub>3</sub>    | Congo red      | 1.00 | 10-50           | 20.00 | 6.00 | 3 | 0.0010 | 48 |
| WO <sub>3</sub>    | Congo red      | 1.00 | 10-50           | 20.00 | 6.00 | 3 | 0.0006 | 48 |
| WO <sub>3</sub>    | Congo red      | 1.00 | 10-50           | 20.00 | 6.00 | 3 | 0.0008 | 48 |
| WO <sub>3</sub>    | Phenol         | 2.00 | D200-800,L35-40 | 30.00 | N/A  | 3 | 0.0007 | 49 |
| WO <sub>3</sub>    | 2-Chlorophenol | 2.00 | D200-800,L35-40 | 30.00 | N/A  | 3 | 0.0205 | 49 |
| WO <sub>3</sub>    | Resorcinol     | 2.00 | D200-800,L35-40 | 30.00 | N/A  | 3 | 0.0007 | 49 |
| WO <sub>3</sub>    | 2-Nitrophenol  | 2.00 | D200-800,L35-40 | 30.00 | N/A  | 3 | 0.0270 | 49 |
| β-MnO <sub>2</sub> | Methylene blue | 0.50 | N/A             | 10.00 | N/A  | 2 | 0.0119 | 50 |
| β-MnO <sub>2</sub> | Methylene blue | 0.04 | 50-100          | 9.60  | N/A  | 1 | 0.0168 | 51 |
| β-MnO <sub>2</sub> | Eosin yellow   | 0.04 | 50-100          | 20.76 | N/A  | 1 | 0.0122 | 51 |
| β-MnO <sub>2</sub> | Methylene blue | 0.04 | 50-100          | 9.60  | N/A  | 3 | 0.0553 | 51 |
| β-MnO <sub>2</sub> | Eosin yellow   | 0.04 | 50-100          | 20.76 | N/A  | 3 | 0.0275 | 51 |
| β-MnO <sub>2</sub> | Rhodamine B    | 0.16 | 15-20           | 9.60  | 3.00 | 3 | 0.0603 | 52 |



|                           |                |      |       |       |       |   |        |    |
|---------------------------|----------------|------|-------|-------|-------|---|--------|----|
| $\beta$ -MnO <sub>2</sub> | Rhodamine B    | 0.16 | 15-20 | 9.60  | 5.00  | 3 | 0.0493 | 52 |
| $\beta$ -MnO <sub>2</sub> | Rhodamine B    | 0.16 | 15-20 | 9.60  | 7.00  | 3 | 0.0028 | 52 |
| $\beta$ -MnO <sub>2</sub> | Rose bengal    | 0.50 | N/A   | 29.21 | 6.00  | 3 | 0.0127 | 53 |
| $\beta$ -MnO <sub>2</sub> | Rose bengal    | 0.50 | N/A   | 29.21 | 6.50  | 3 | 0.0148 | 53 |
| $\beta$ -MnO <sub>2</sub> | Rose bengal    | 0.50 | N/A   | 29.21 | 7.00  | 3 | 0.0185 | 53 |
| $\beta$ -MnO <sub>2</sub> | Rose bengal    | 0.50 | N/A   | 29.21 | 7.50  | 3 | 0.0213 | 53 |
| $\beta$ -MnO <sub>2</sub> | Rose bengal    | 0.50 | N/A   | 29.21 | 8.00  | 3 | 0.0239 | 53 |
| $\beta$ -MnO <sub>2</sub> | Rose bengal    | 0.50 | N/A   | 29.21 | 8.50  | 3 | 0.0205 | 53 |
| $\beta$ -MnO <sub>2</sub> | Rose bengal    | 0.50 | N/A   | 29.21 | 9.00  | 3 | 0.0178 | 53 |
| $\beta$ -MnO <sub>2</sub> | Rose bengal    | 0.50 | N/A   | 29.21 | 9.50  | 3 | 0.0151 | 53 |
| $\beta$ -MnO <sub>2</sub> | Rose bengal    | 0.50 | N/A   | 29.21 | 10.00 | 3 | 0.0133 | 53 |
| $\beta$ -MnO <sub>2</sub> | Rose bengal    | 0.50 | N/A   | 19.47 | 8.00  | 3 | 0.0146 | 53 |
| $\beta$ -MnO <sub>2</sub> | Rose bengal    | 0.50 | N/A   | 21.91 | 8.00  | 3 | 0.0163 | 53 |
| $\beta$ -MnO <sub>2</sub> | Rose bengal    | 0.50 | N/A   | 24.34 | 8.00  | 3 | 0.0182 | 53 |
| $\beta$ -MnO <sub>2</sub> | Rose bengal    | 0.50 | N/A   | 26.78 | 8.00  | 3 | 0.0207 | 53 |
| $\beta$ -MnO <sub>2</sub> | Rose bengal    | 0.50 | N/A   | 31.64 | 8.00  | 3 | 0.0220 | 53 |
| $\beta$ -MnO <sub>2</sub> | Rose bengal    | 0.50 | N/A   | 34.08 | 8.00  | 3 | 0.0201 | 53 |
| $\beta$ -MnO <sub>2</sub> | Rose bengal    | 0.50 | N/A   | 36.51 | 8.00  | 3 | 0.0186 | 53 |
| $\beta$ -MnO <sub>2</sub> | Rose bengal    | 0.50 | N/A   | 38.95 | 8.00  | 3 | 0.0172 | 53 |
| $\beta$ -MnO <sub>2</sub> | Rose bengal    | 0.10 | N/A   | 29.21 | 8.00  | 3 | 0.0126 | 53 |
| $\beta$ -MnO <sub>2</sub> | Rose bengal    | 0.20 | N/A   | 29.21 | 8.00  | 3 | 0.0141 | 53 |
| $\beta$ -MnO <sub>2</sub> | Rose bengal    | 0.30 | N/A   | 29.21 | 8.00  | 3 | 0.0173 | 53 |
| $\beta$ -MnO <sub>2</sub> | Rose bengal    | 0.40 | N/A   | 29.21 | 8.00  | 3 | 0.0199 | 53 |
| $\beta$ -MnO <sub>2</sub> | Rose bengal    | 0.60 | N/A   | 29.21 | 8.00  | 3 | 0.0239 | 53 |
| $\beta$ -MnO <sub>2</sub> | Rose bengal    | 0.70 | N/A   | 29.21 | 8.00  | 3 | 0.0239 | 53 |
| $\beta$ -MnO <sub>2</sub> | Rose bengal    | 0.80 | N/A   | 29.21 | 8.00  | 3 | 0.0239 | 53 |
| $\beta$ -MnO <sub>2</sub> | Rose bengal    | 0.90 | N/A   | 29.21 | 8.00  | 3 | 0.0239 | 53 |
| $\beta$ -MnO <sub>2</sub> | Rose bengal    | 0.50 | N/A   | 29.21 | 8.00  | 3 | 0.0086 | 53 |
| $\beta$ -MnO <sub>2</sub> | Rose bengal    | 0.50 | N/A   | 29.21 | 8.00  | 3 | 0.0105 | 53 |
| $\beta$ -MnO <sub>2</sub> | Rose bengal    | 0.50 | N/A   | 29.21 | 8.00  | 3 | 0.0127 | 53 |
| $\beta$ -MnO <sub>2</sub> | Rose bengal    | 0.50 | N/A   | 29.21 | 8.00  | 3 | 0.0161 | 53 |
| $\beta$ -MnO <sub>2</sub> | Rose bengal    | 0.50 | N/A   | 29.21 | 8.00  | 3 | 0.0193 | 53 |
| $\beta$ -MnO <sub>2</sub> | Rose bengal    | 0.50 | N/A   | 29.21 | 8.00  | 3 | 0.0223 | 53 |
| $\beta$ -MnO <sub>2</sub> | Methylene blue | 0.16 | 3200  | 4.48  | 5.50  | 3 | 0.0011 | 54 |
| $\beta$ -MnO <sub>2</sub> | Methylene blue | 0.16 | 3200  | 4.48  | 6.00  | 3 | 0.0014 | 54 |
| $\beta$ -MnO <sub>2</sub> | Methylene blue | 0.16 | 3200  | 4.48  | 6.50  | 3 | 0.0023 | 54 |
| $\beta$ -MnO <sub>2</sub> | Methylene blue | 0.16 | 3200  | 4.48  | 7.00  | 3 | 0.0028 | 54 |
| $\beta$ -MnO <sub>2</sub> | Methylene blue | 0.16 | 3200  | 4.48  | 7.50  | 3 | 0.0033 | 54 |
| $\beta$ -MnO <sub>2</sub> | Methylene blue | 0.16 | 3200  | 4.48  | 8.00  | 3 | 0.0025 | 54 |
| $\beta$ -MnO <sub>2</sub> | Methylene blue | 0.16 | 3200  | 4.48  | 8.50  | 3 | 0.0015 | 54 |
| $\beta$ -MnO <sub>2</sub> | Methylene blue | 0.16 | 3200  | 4.48  | 9.00  | 3 | 0.0012 | 54 |

|                           |                |      |      |       |      |   |        |    |
|---------------------------|----------------|------|------|-------|------|---|--------|----|
| $\beta$ -MnO <sub>2</sub> | Azure B        | 0.20 | 3200 | 15.29 | 5.50 | 3 | 0.0022 | 54 |
| $\beta$ -MnO <sub>2</sub> | Azure B        | 0.20 | 3200 | 15.29 | 6.00 | 3 | 0.0034 | 54 |
| $\beta$ -MnO <sub>2</sub> | Azure B        | 0.20 | 3200 | 15.29 | 6.50 | 3 | 0.0051 | 54 |
| $\beta$ -MnO <sub>2</sub> | Azure B        | 0.20 | 3200 | 15.29 | 7.00 | 3 | 0.0039 | 54 |
| $\beta$ -MnO <sub>2</sub> | Azure B        | 0.20 | 3200 | 15.29 | 7.50 | 3 | 0.0027 | 54 |
| $\beta$ -MnO <sub>2</sub> | Azure B        | 0.20 | 3200 | 15.29 | 8.00 | 3 | 0.0022 | 54 |
| $\beta$ -MnO <sub>2</sub> | Azure B        | 0.20 | 3200 | 15.29 | 8.50 | 3 | 0.0020 | 54 |
| $\beta$ -MnO <sub>2</sub> | Azure B        | 0.20 | 3200 | 15.29 | 9.00 | 3 | 0.0018 | 54 |
| $\beta$ -MnO <sub>2</sub> | Toluidine blue | 0.20 | 3200 | 12.23 | 5.50 | 3 | 0.0013 | 54 |
| $\beta$ -MnO <sub>2</sub> | Toluidine blue | 0.20 | 3200 | 12.23 | 6.00 | 3 | 0.0023 | 54 |
| $\beta$ -MnO <sub>2</sub> | Toluidine blue | 0.20 | 3200 | 12.23 | 6.50 | 3 | 0.0026 | 54 |
| $\beta$ -MnO <sub>2</sub> | Toluidine blue | 0.20 | 3200 | 12.23 | 7.00 | 3 | 0.0031 | 54 |
| $\beta$ -MnO <sub>2</sub> | Toluidine blue | 0.20 | 3200 | 12.23 | 7.50 | 3 | 0.0035 | 54 |
| $\beta$ -MnO <sub>2</sub> | Toluidine blue | 0.20 | 3200 | 12.23 | 8.00 | 3 | 0.0040 | 54 |
| $\beta$ -MnO <sub>2</sub> | Toluidine blue | 0.20 | 3200 | 12.23 | 8.50 | 3 | 0.0031 | 54 |
| $\beta$ -MnO <sub>2</sub> | Toluidine blue | 0.20 | 3200 | 12.23 | 9.00 | 3 | 0.0024 | 54 |
| $\beta$ -MnO <sub>2</sub> | Methylene blue | 0.16 | 3200 | 2.62  | 7.50 | 3 | 0.0018 | 54 |
| $\beta$ -MnO <sub>2</sub> | Methylene blue | 0.16 | 3200 | 3.20  | 7.50 | 3 | 0.0023 | 54 |
| $\beta$ -MnO <sub>2</sub> | Methylene blue | 0.16 | 3200 | 3.90  | 7.50 | 3 | 0.0029 | 54 |
| $\beta$ -MnO <sub>2</sub> | Methylene blue | 0.16 | 3200 | 4.54  | 7.50 | 3 | 0.0033 | 54 |
| $\beta$ -MnO <sub>2</sub> | Methylene blue | 0.16 | 3200 | 5.15  | 7.50 | 3 | 0.0023 | 54 |
| $\beta$ -MnO <sub>2</sub> | Methylene blue | 0.16 | 3200 | 5.79  | 7.50 | 3 | 0.0011 | 54 |
| $\beta$ -MnO <sub>2</sub> | Azure B        | 0.20 | 3200 | 10.70 | 6.50 | 3 | 0.0018 | 54 |
| $\beta$ -MnO <sub>2</sub> | Azure B        | 0.20 | 3200 | 12.23 | 6.50 | 3 | 0.0019 | 54 |
| $\beta$ -MnO <sub>2</sub> | Azure B        | 0.20 | 3200 | 13.76 | 6.50 | 3 | 0.0038 | 54 |
| $\beta$ -MnO <sub>2</sub> | Azure B        | 0.20 | 3200 | 15.29 | 6.50 | 3 | 0.0051 | 54 |
| $\beta$ -MnO <sub>2</sub> | Azure B        | 0.20 | 3200 | 16.82 | 6.50 | 3 | 0.0032 | 54 |
| $\beta$ -MnO <sub>2</sub> | Azure B        | 0.20 | 3200 | 18.35 | 6.50 | 3 | 0.0020 | 54 |
| $\beta$ -MnO <sub>2</sub> | Toluidine blue | 0.20 | 3200 | 10.70 | 8.00 | 3 | 0.0023 | 54 |
| $\beta$ -MnO <sub>2</sub> | Toluidine blue | 0.20 | 3200 | 12.23 | 8.00 | 3 | 0.0028 | 54 |
| $\beta$ -MnO <sub>2</sub> | Toluidine blue | 0.20 | 3200 | 13.76 | 8.00 | 3 | 0.0040 | 54 |
| $\beta$ -MnO <sub>2</sub> | Toluidine blue | 0.20 | 3200 | 15.29 | 8.00 | 3 | 0.0021 | 54 |
| $\beta$ -MnO <sub>2</sub> | Toluidine blue | 0.20 | 3200 | 16.82 | 8.00 | 3 | 0.0020 | 54 |
| $\beta$ -MnO <sub>2</sub> | Toluidine blue | 0.20 | 3200 | 18.35 | 8.00 | 3 | 0.0018 | 54 |
| $\beta$ -MnO <sub>2</sub> | Methylene blue | 0.05 | 3200 | 4.48  | 7.50 | 3 | 0.0009 | 54 |
| $\beta$ -MnO <sub>2</sub> | Methylene blue | 0.10 | 3200 | 4.48  | 7.50 | 3 | 0.0016 | 54 |
| $\beta$ -MnO <sub>2</sub> | Methylene blue | 0.15 | 3200 | 4.48  | 7.50 | 3 | 0.0020 | 54 |
| $\beta$ -MnO <sub>2</sub> | Methylene blue | 0.20 | 3200 | 4.48  | 7.50 | 3 | 0.0033 | 54 |
| $\beta$ -MnO <sub>2</sub> | Methylene blue | 0.25 | 3200 | 4.48  | 7.50 | 3 | 0.0034 | 54 |
| $\beta$ -MnO <sub>2</sub> | Methylene blue | 0.30 | 3200 | 4.48  | 7.50 | 3 | 0.0033 | 54 |
| $\beta$ -MnO <sub>2</sub> | Azure B        | 0.05 | 3200 | 15.29 | 6.50 | 3 | 0.0020 | 54 |

|                           |                |      |      |       |      |   |        |    |
|---------------------------|----------------|------|------|-------|------|---|--------|----|
| $\beta$ -MnO <sub>2</sub> | Azure B        | 0.10 | 3200 | 15.29 | 6.50 | 3 | 0.0027 | 54 |
| $\beta$ -MnO <sub>2</sub> | Azure B        | 0.15 | 3200 | 15.29 | 6.50 | 3 | 0.0038 | 54 |
| $\beta$ -MnO <sub>2</sub> | Azure B        | 0.20 | 3200 | 15.29 | 6.50 | 3 | 0.0051 | 54 |
| $\beta$ -MnO <sub>2</sub> | Azure B        | 0.25 | 3200 | 15.29 | 6.50 | 3 | 0.0051 | 54 |
| $\beta$ -MnO <sub>2</sub> | Azure B        | 0.30 | 3200 | 15.29 | 6.50 | 3 | 0.0051 | 54 |
| $\beta$ -MnO <sub>2</sub> | Toluidine blue | 0.05 | 3200 | 12.23 | 8.00 | 3 | 0.0014 | 54 |
| $\beta$ -MnO <sub>2</sub> | Toluidine blue | 0.10 | 3200 | 12.23 | 8.00 | 3 | 0.0021 | 54 |
| $\beta$ -MnO <sub>2</sub> | Toluidine blue | 0.15 | 3200 | 12.23 | 8.00 | 3 | 0.0029 | 54 |
| $\beta$ -MnO <sub>2</sub> | Toluidine blue | 0.20 | 3200 | 12.23 | 8.00 | 3 | 0.0040 | 54 |
| $\beta$ -MnO <sub>2</sub> | Toluidine blue | 0.25 | 3200 | 12.23 | 8.00 | 3 | 0.0041 | 54 |
| $\beta$ -MnO <sub>2</sub> | Toluidine blue | 0.30 | 3200 | 12.23 | 8.00 | 3 | 0.0040 | 54 |
| $\beta$ -MnO <sub>2</sub> | Methylene blue | 0.16 | 3200 | 4.48  | 7.50 | 3 | 0.0016 | 54 |
| $\beta$ -MnO <sub>2</sub> | Methylene blue | 0.16 | 3200 | 4.48  | 7.50 | 3 | 0.0023 | 54 |
| $\beta$ -MnO <sub>2</sub> | Methylene blue | 0.16 | 3200 | 4.48  | 7.50 | 3 | 0.0033 | 54 |
| $\beta$ -MnO <sub>2</sub> | Methylene blue | 0.16 | 3200 | 4.48  | 7.50 | 3 | 0.0044 | 54 |
| $\beta$ -MnO <sub>2</sub> | Methylene blue | 0.16 | 3200 | 4.48  | 7.50 | 3 | 0.0055 | 54 |
| $\beta$ -MnO <sub>2</sub> | Methylene blue | 0.16 | 3200 | 4.48  | 7.50 | 3 | 0.0077 | 54 |
| $\beta$ -MnO <sub>2</sub> | Azure B        | 0.20 | 3200 | 15.29 | 6.50 | 3 | 0.0014 | 54 |
| $\beta$ -MnO <sub>2</sub> | Azure B        | 0.20 | 3200 | 15.29 | 6.50 | 3 | 0.0033 | 54 |
| $\beta$ -MnO <sub>2</sub> | Azure B        | 0.20 | 3200 | 15.29 | 6.50 | 3 | 0.0051 | 54 |
| $\beta$ -MnO <sub>2</sub> | Azure B        | 0.20 | 3200 | 15.29 | 6.50 | 3 | 0.0059 | 54 |
| $\beta$ -MnO <sub>2</sub> | Azure B        | 0.20 | 3200 | 15.29 | 6.50 | 3 | 0.0068 | 54 |
| $\beta$ -MnO <sub>2</sub> | Azure B        | 0.20 | 3200 | 15.29 | 6.50 | 3 | 0.0077 | 54 |
| $\beta$ -MnO <sub>2</sub> | Toluidine blue | 0.20 | 3200 | 12.23 | 8.00 | 3 | 0.0015 | 54 |
| $\beta$ -MnO <sub>2</sub> | Toluidine blue | 0.20 | 3200 | 12.23 | 8.00 | 3 | 0.0026 | 54 |
| $\beta$ -MnO <sub>2</sub> | Toluidine blue | 0.20 | 3200 | 12.23 | 8.00 | 3 | 0.0040 | 54 |
| $\beta$ -MnO <sub>2</sub> | Toluidine blue | 0.20 | 3200 | 12.23 | 8.00 | 3 | 0.0051 | 54 |
| $\beta$ -MnO <sub>2</sub> | Toluidine blue | 0.20 | 3200 | 12.23 | 8.00 | 3 | 0.0061 | 54 |
| $\beta$ -MnO <sub>2</sub> | Toluidine blue | 0.20 | 3200 | 12.23 | 8.00 | 3 | 0.0063 | 54 |
| $\beta$ -MnO <sub>2</sub> | Methylene blue | 0.16 | 800  | 4.48  | 7.50 | 3 | 0.0083 | 54 |
| $\beta$ -MnO <sub>2</sub> | Methylene blue | 0.16 | 1600 | 4.48  | 7.50 | 3 | 0.0044 | 54 |
| $\beta$ -MnO <sub>2</sub> | Methylene blue | 0.16 | 2400 | 4.48  | 7.50 | 3 | 0.0040 | 54 |
| $\beta$ -MnO <sub>2</sub> | Methylene blue | 0.16 | 3200 | 4.48  | 7.50 | 3 | 0.0033 | 54 |
| $\beta$ -MnO <sub>2</sub> | Methylene blue | 0.16 | 4000 | 4.48  | 7.50 | 3 | 0.0030 | 54 |
| $\beta$ -MnO <sub>2</sub> | Azure B        | 0.20 | 800  | 15.29 | 6.50 | 3 | 0.0104 | 54 |
| $\beta$ -MnO <sub>2</sub> | Azure B        | 0.20 | 1600 | 15.29 | 6.50 | 3 | 0.0065 | 54 |
| $\beta$ -MnO <sub>2</sub> | Azure B        | 0.20 | 2400 | 15.29 | 6.50 | 3 | 0.0057 | 54 |
| $\beta$ -MnO <sub>2</sub> | Azure B        | 0.20 | 3200 | 15.29 | 6.50 | 3 | 0.0051 | 54 |
| $\beta$ -MnO <sub>2</sub> | Azure B        | 0.20 | 4000 | 15.29 | 6.50 | 3 | 0.0038 | 54 |
| $\beta$ -MnO <sub>2</sub> | Toluidine blue | 0.20 | 800  | 12.23 | 8.00 | 3 | 0.0099 | 54 |
| $\beta$ -MnO <sub>2</sub> | Toluidine blue | 0.20 | 1600 | 12.23 | 8.00 | 3 | 0.0060 | 54 |

|                           |                |      |      |       |      |   |        |    |
|---------------------------|----------------|------|------|-------|------|---|--------|----|
| $\beta$ -MnO <sub>2</sub> | Toluidine blue | 0.20 | 2400 | 12.23 | 8.00 | 3 | 0.0049 | 54 |
| $\beta$ -MnO <sub>2</sub> | Toluidine blue | 0.20 | 3200 | 12.23 | 8.00 | 3 | 0.0040 | 54 |
| $\beta$ -MnO <sub>2</sub> | Toluidine blue | 0.20 | 4000 | 12.23 | 8.00 | 3 | 0.0030 | 54 |

\*D denotes diameter. L denotes length.

#For light type, 1 denotes UV, 2 denotes visible light, and 3 denotes sunlight.

## References:

- [1] Lee, K. M., Hamid, S. B. A., & Lai, C. W. (2015). Mechanism and kinetics study for photocatalytic oxidation degradation: a case study for phenoxyacetic acid organic pollutant. *Journal of Nanomaterials*, 2015, 9.
- [2] Rajamanickam, D., & Shanthi, M. (2016). Photocatalytic degradation of an organic pollutant by zinc oxide-solar process. *Arabian Journal of Chemistry*, 9, S1858-S1868.
- [3] Güy, N., Çakar, S., & Özacar, M. (2016). Comparison of palladium/zinc oxide photocatalysts prepared by different palladium doping methods for congo red degradation. *Journal of colloid and interface science*, 466, 128-137.
- [4] Lamba, R., Umar, A., Mehta, S. K., & Kansal, S. K. (2015). Well-crystalline porous ZnO–SnO<sub>2</sub> nanosheets: An effective visible-light driven photocatalyst and highly sensitive smart sensor material. *Talanta*, 131, 490-498.
- [5] Shinde, D. R., Tambade, P. S., Chaskar, M. G., & Gadave, K. M. (2017). Photocatalytic degradation of dyes in water by analytical reagent grades ZnO, TiO<sub>2</sub> and SnO<sub>2</sub>: a comparative study. *Drinking Water Engineering and Science*, 10(2), 109-117.
- [6] Hwangbo, M., Claycomb, E. C., Liu, Y., Alivio, T. E., Banerjee, S., & Chu, K. H. (2019). Effectiveness of zinc oxide-assisted photocatalysis for concerned constituents in reclaimed wastewater: 1, 4-Dioxane, trihalomethanes, antibiotics, antibiotic resistant bacteria (ARB), and antibiotic resistance genes (ARGs). *Science of The Total Environment*, 649, 1189-1197.
- [7] El-Kemary, M., El-Shamy, H., & El-Mehasseb, I. (2010). Photocatalytic degradation of ciprofloxacin drug in water using ZnO nanoparticles. *Journal of Luminescence*, 130(12), 2327-2331.
- [8] Bohdziewicz, J., Kudlek, E., & Dudziak, M. (2016). Influence of the catalyst type (TiO<sub>2</sub> and ZnO) on the photocatalytic oxidation of pharmaceuticals in the aquatic environment. *Desalination and Water Treatment*, 57(3), 1552-1563.
- [9] Bhuyan, B., Paul, B., Purkayastha, D. D., Dhar, S. S., & Behera, S. (2016). Facile synthesis and characterization of zinc oxide nanoparticles and studies of their catalytic activity towards ultrasound-assisted degradation of metronidazole. *Materials Letters*, 168, 158-162.
- [10] Ba-Abbad, M. M., Kadhum, A. A. H., Mohamad, A. B., Takriff, M. S., & Sopian, K. (2013). Visible light photocatalytic activity of Fe<sup>3+</sup>-doped ZnO nanoparticle prepared via sol-gel technique. *Chemosphere*, 91(11), 1604-1611.
- [11] Sin, J. C., Lam, S. M., Lee, K. T., & Mohamed, A. R. (2013). Degrading two endocrine-disrupting chemicals from water by UV irradiation with the presence of nanophotocatalysts. *Desalination and Water Treatment*, 51(16-18), 3505-3520.
- [12] Wu, S., Cao, H., Yin, S., Liu, X., & Zhang, X. (2009). Amino acid-assisted hydrothermal synthesis and photocatalysis of SnO<sub>2</sub> nanocrystals. *The Journal of Physical Chemistry C*, 113(41), 17893-17898.
- [13] Kim, S. P., Choi, M. Y., & Choi, H. C. (2016). Photocatalytic activity of SnO<sub>2</sub> nanoparticles in methylene blue degradation. *Materials Research Bulletin*, 74, 85-89.

- [14] Elango, G., & Roopan, S. M. (2016). Efficacy of SnO<sub>2</sub> nanoparticles toward photocatalytic degradation of methylene blue dye. *Journal of Photochemistry and Photobiology B: Biology*, 155, 34-38.
- [15] Talebian, N., & Jafarinezhad, F. (2013). Morphology-controlled synthesis of SnO<sub>2</sub> nanostructures using hydrothermal method and their photocatalytic applications. *Ceramics International*, 39(7), 8311-8317.
- [16] Wu, S., Cao, H., Yin, S., Liu, X., & Zhang, X. (2009). Amino acid-assisted hydrothermal synthesis and photocatalysis of SnO<sub>2</sub> nanocrystals. *The Journal of Physical Chemistry C*, 113(41), 17893-17898.
- [17] Esmailzadeh Kandjani, A., Farzalipour Tabriz, M., Arefian, N. A., Vaezi, M. R., Halek, F., & Sadrnezhaad, S. K. (2010). Photocatalytic decoloration of Acid Red 27 in presence of SnO<sub>2</sub> nanoparticles. *Water Science and Technology*, 62(6), 1256-1264.
- [18] Das, O. R., Uddin, M. T., Rahman, M. M., & Bhoumick, M. C. (2018, September). Highly active carbon supported Sn/SnO<sub>2</sub> photocatalysts for degrading organic dyes. In *Journal of Physics: Conference Series* (Vol. 1086, No. 1, p. 012011). IOP Publishing.
- [19] Vu, X. H., Phuoc, L. H., Dien, N. D., Pham, T. T. H., & Thanh, L. D. (2019). Photocatalytic Degradation of Methylene Blue (MB) over  $\alpha$ -Fe<sub>2</sub>O<sub>3</sub> Nanospindles Prepared by a Hydrothermal Route. *Journal of Electronic Materials*, 48(5), 2978-2985.
- [20] Sharma, P., Kumar, R., Chauhan, S., Singh, D., & Chauhan, M. S. (2014). Facile growth and characterization of  $\alpha$ -Fe<sub>2</sub>O<sub>3</sub> nanoparticles for photocatalytic degradation of methyl orange. *Journal of Nanoscience and Nanotechnology*, 14(8), 6153-6157.
- [21] Imran, M., Abutaleb, A., Ali, M. A., Ahamad, T., Ansari, A. R., Shariq, M., ... & Khan, A. (2020). UV light enabled photocatalytic activity of  $\alpha$ -Fe<sub>2</sub>O<sub>3</sub> nanoparticles synthesized via phase transformation. *Materials Letters*, 258, 126748.
- [22] Rincón Joya, M., Barba Ortega, J., Malafatti, J. O. D., & Paris, E. C. (2019). Evaluation of Photocatalytic Activity in Water Pollutants and Cytotoxic Response of  $\alpha$ -Fe<sub>2</sub>O<sub>3</sub> Nanoparticles. *ACS omega*, 4(17), 17477-17486.
- [23] Jahagirdar, A. A., Ahmed, M. Z., Donappa, N., Nagabhushana, H., & Nagabhushana, B. M. (2014). Photocatalytic degradation of rhodamine B using nanocrystalline  $\alpha$ -Fe<sub>2</sub>O<sub>3</sub>. *J. Mater. Environ. Sci*, 5(5), 1426-1433.
- [24] Ismail, A. A., Ali, A. M., Harraz, F. A., Faisal, M., Shoukry, H., & Al-Salami, A. E. (2019). A Facile Synthesis of  $\alpha$ -Fe<sub>2</sub>O<sub>3</sub>/Carbon Nanotubes and Their Photocatalytic and Electrochemical Sensing Performances. *Int. J. Electrochem. Sci*, 14, 15-32.
- [25] Liu, X., Chen, K., Shim, J. J., & Huang, J. (2015). Facile synthesis of porous Fe<sub>2</sub>O<sub>3</sub> nanorods and their photocatalytic properties. *Journal of Saudi Chemical Society*, 19(5), 479-484. [26] Zhang, G. Y., Feng, Y., Xu, Y. Y., Gao, D. Z., & Sun, Y. Q. (2012). Controlled synthesis of mesoporous  $\alpha$ -Fe<sub>2</sub>O<sub>3</sub> nanorods and visible light photocatalytic property. *Materials Research Bulletin*, 47(3), 625-630.
- [27] Maji, S. K., Mukherjee, N., Mondal, A., & Adhikary, B. (2012). Synthesis, characterization and photocatalytic activity of  $\alpha$ -Fe<sub>2</sub>O<sub>3</sub> nanoparticles. *Polyhedron*, 33(1), 145-149.
- [28] Pal, B., & Sharon, M. (1998). Photocatalytic degradation of salicylic acid by colloidal Fe<sub>2</sub>O<sub>3</sub> particles. *Journal of Chemical Technology & Biotechnology: International Research in Process, Environmental AND Clean Technology*, 73(3), 269-273.
- [29] Diaz, C., Barrientos, L., Carrillo, D., Valdebenito, J., Valenzuela, M. L., Allende, P., ... & O'Dwyer, C. (2016). Solvent-less method for efficient photocatalytic  $\alpha$ -Fe<sub>2</sub>O<sub>3</sub> nanoparticles using macromolecular polymeric precursors. *New Journal of Chemistry*, 40(8), 6768-6776.

- [30] Xu, J. S., & Zhu, Y. J. (2011).  $\alpha$ -Fe<sub>2</sub>O<sub>3</sub> hierarchically hollow microspheres self-assembled with nanosheets: surfactant-free solvothermal synthesis, magnetic and photocatalytic properties. *CrystEngComm*, 13(16), 5162-5169.
- [31] Pawar, M. J., & Khajone, A. D. (2012). Photodegradation of malachite green dye over sol-gel synthesized nanocrystalline  $\alpha$ -Fe<sub>2</sub>O<sub>3</sub>. *Journal of Chemical and Pharmaceutical Research*, 4(4), 1880-1884.
- [32] Cheng, X. L., Jiang, J. S., Hu, M., Mao, G. Y., Bu, F. X., Lin, C. C., ... & Zhang, Q. H. (2012). Controlled synthesis of novel flowerlike  $\alpha$ -Fe<sub>2</sub>O<sub>3</sub> nanostructures via a one-step biphasic interfacial reaction route. *CrystEngComm*, 14(22), 7701-7708.
- [33] Liu, Y., Yu, H., Zhan, S., Li, Y., Lv, Z., Yang, X., & Yu, Y. (2011). Fast degradation of methylene blue with electrospun hierarchical  $\alpha$ -Fe<sub>2</sub>O<sub>3</sub> nanostructured fibers. *Journal of sol-gel science and technology*, 58(3), 716.
- [34] Pino, E., & Encinas, M. V. (2012). Photocatalytic degradation of chlorophenols on TiO<sub>2</sub>-325mesh and TiO<sub>2</sub>-P25. An extended kinetic study of photodegradation under competitive conditions. *Journal of photochemistry and photobiology A: Chemistry*, 242, 20-27.
- [35] Baran, W., Adamek, E., Sobczak, A., & Makowski, A. (2009). Photocatalytic degradation of sulfa drugs with TiO<sub>2</sub>, Fe salts and TiO<sub>2</sub>/FeCl<sub>3</sub> in aquatic environment—Kinetics and degradation pathway. *Applied Catalysis B: Environmental*, 90(3-4), 516-525.
- [36] Doll, T. E., & Frimmel, F. H. (2004). Kinetic study of photocatalytic degradation of carbamazepine, clofibric acid, iomeprol and iopromide assisted by different TiO<sub>2</sub> materials—determination of intermediates and reaction pathways. *Water research*, 38(4), 955-964.
- [37] Chung, Y. C., & Chen, C. Y. (2009). Degradation of azo dye reactive violet 5 by TiO<sub>2</sub> photocatalysis. *Environmental Chemistry Letters*, 7(4), 347-352.
- [38] Samsudin, E. M., Goh, S. N., Wu, T. Y., Ling, T. T., Hamid, S. A., & Juan, J. C. (2015). Evaluation on the photocatalytic degradation activity of reactive blue 4 using pure anatase nano-TiO<sub>2</sub>. *Sains Malaysiana*, 44(7), 1011-1019.
- [39] Gautam, A., Kshirsagar, A., Biswas, R., Banerjee, S., & Khanna, P. K. (2016). Photodegradation of organic dyes based on anatase and rutile TiO<sub>2</sub> nanoparticles. *RSC Advances*, 6(4), 2746-2759.
- [40] Nguyen, T. T., Nam, S. N., Son, J., & Oh, J. (2019). Tungsten Trioxide (WO<sub>3</sub>)-assisted Photocatalytic Degradation of Amoxicillin by Simulated Solar Irradiation. *Scientific Reports*, 9(1), 9349.
- [41] Vamvasakis, I., Georgaki, I., Vernardou, D., Kenanakis, G., & Katsarakis, N. (2015). Synthesis of WO<sub>3</sub> catalytic powders: evaluation of photocatalytic activity under NUV/visible light irradiation and alkaline reaction pH. *Journal of Sol-Gel Science and Technology*, 76(1), 120-128.
- [42] Huang, J., Xu, X., Gu, C., Fu, G., Wang, W., & Liu, J. (2012). Flower-like and hollow sphere-like WO<sub>3</sub> porous nanostructures: Selective synthesis and their photocatalysis property. *Materials Research Bulletin*, 47(11), 3224-3232.
- [43] Huang, J., Xiao, L., & Yang, X. (2013). WO<sub>3</sub> nanoplates, hierarchical flower-like assemblies and their photocatalytic properties. *Materials Research Bulletin*, 48(8), 2782-2785.
- [44] Martínez-de la Cruz, A., Martínez, D. S., & Cuéllar, E. L. (2010). Synthesis and characterization of WO<sub>3</sub> nanoparticles prepared by the precipitation method: evaluation of photocatalytic activity under vis-irradiation. *Solid State Sciences*, 12(1), 88-94.

- [45] Sánchez-Martínez, D., Martínez-De La Cruz, A., & López-Cuéllar, E. (2013). Synthesis of WO<sub>3</sub> nanoparticles by citric acid-assisted precipitation and evaluation of their photocatalytic properties. *Materials Research Bulletin*, 48(2), 691-697.
- [46] Luxmi, V., & Kumar, A. (2019). Enhanced photocatalytic performance of m-WO<sub>3</sub> and m-Fe-doped WO<sub>3</sub> cuboids synthesized via sol-gel approach using egg albumen as a solvent. *Materials Science in Semiconductor Processing*, 104, 104690.
- [47] Hernandez-Uresti, D. B., Sánchez-Martínez, D., Martínez-De La Cruz, A., Sepúlveda-Guzmán, S., & Torres-Martínez, L. M. (2014). Characterization and photocatalytic properties of hexagonal and monoclinic WO<sub>3</sub> prepared via microwave-assisted hydrothermal synthesis. *Ceramics International*, 40(3), 4767-4775.
- [48] Martínez, D. S., Martínez-De La Cruz, A., & Cuéllar, E. L. (2011). Photocatalytic properties of WO<sub>3</sub> nanoparticles obtained by precipitation in presence of urea as complexing agent. *Applied Catalysis A: General*, 398(1-2), 179-186.
- [49] Aslam, M., Ismail, I. M., Chandrasekaran, S., & Hameed, A. (2014). Morphology controlled bulk synthesis of disc-shaped WO<sub>3</sub> powder and evaluation of its photocatalytic activity for the degradation of phenols. *Journal of hazardous materials*, 276, 120-128.
- [50] Zhao, J., Nan, J., Zhao, Z., Li, N., Liu, J., & Cui, F. (2017). Energy-efficient fabrication of a novel multivalence Mn<sub>3</sub>O<sub>4</sub>-MnO<sub>2</sub> heterojunction for dye degradation under visible light irradiation. *Applied Catalysis B: Environmental*, 202, 509-517.
- [51] Das, S., Samanta, A., & Jana, S. (2017). Light-assisted synthesis of hierarchical flower-like MnO<sub>2</sub> nanocomposites with solar light induced enhanced photocatalytic activity. *ACS Sustainable Chemistry & Engineering*, 5(10), 9086-9094.
- [52] Gagrani, A., Zhou, J., & Tsuzuki, T. (2018). Solvent free mechanochemical synthesis of MnO<sub>2</sub> for the efficient degradation of Rhodamine-B. *Ceramics International*, 44(5), 4694-4698.
- [53] Mittal, N., Shah, A., Punjabi, P. B., & Sharma, V. K. (2009). Photodegradation of rose bengal using MnO<sub>2</sub> (manganese dioxide). *Rasayan J. chem*, 2(2), 516-520.
- [54] Ameta, K. L., Malkani, R. K., & Ameta, S. C. (2010). USE OF SEMICONDUCTING MANGANESE(IV) OXIDE PARTICULATE SYSTEM AS A PHOTOCATALYST: PHOTOASSISTED BLEACHING OF SOME DYES. *International Journal of Chemical Sciences*, 8(3), 1658-1668.
